# Supplementary material for: Knee Biomechanics During Cutting Maneuvers and Secondary ACL Injury Risk: A Prospective Cohort Study of Knee Biomechanics in 756 Female Elite Handball and Soccer Players
Source: PubMed Central journal article supplement (PMC10986153; doi:10.1177/03635465241234255), 2024-03-08
Supplement: sj-pdf-1-ajs-10.1177_03635465241234255.pdf [file sj-pdf-1-ajs-10.1177_03635465241234255.pdf]

## Knee biomechanics during cutting maneuvers and secondary ACL injury risk – a combined prospective cohort and cross-sectional study of knee biomechanics in 756 female elite handball and football players

### Appendix

**Table A1.** Comparison of participant characteristics, knee biomechanics and cutting technique variables between players with a secondary ipsilateral ACL injury (shaded grey) and the remaining three groups (n = 731 for kinematics; n = 690 for kinetics).

|                                                            | Prev/New ACL group,<br>ipsilateral leg of<br>players with a new<br>ipsilateral injury (n=6) | Prev ACL group,<br>ipsilateral leg<br>(n=49) | p            | MD [95% CI]             | New ACL group,<br>leg with new injury<br>(n=46) | p            | MD [95% CI]               | No ACL group,<br>random leg<br>(n=630) | p            | MD [95% CI]             |
|------------------------------------------------------------|---------------------------------------------------------------------------------------------|----------------------------------------------|--------------|-------------------------|-------------------------------------------------|--------------|---------------------------|----------------------------------------|--------------|-------------------------|
| Age (y)                                                    | 20.9 ± 2.1                                                                                  | 23.3 ± 4.2                                   | 0.163        | 2.5 [-1.0, 5.9]         | 19.3 ± 3.1                                      | 0.367        | 1.6 [-1.9, 5.1]           | 20.7 ± 3.9                             | 0.907        | 0.2 [-3.1, 3.5]         |
| Body mass (kg)                                             | 74.8 ± 10.2                                                                                 | 66.8 ± 7.2                                   | <b>0.014</b> | <b>8.0* [1.6, 14.3]</b> | 66.4 ± 7.6                                      | <b>0.010</b> | <b>8.4* [2.0, 14.8]</b>   | 66.0 ± 7.7                             | <b>0.005</b> | <b>8.8* [2.7, 14.8]</b> |
| Height (cm)                                                | 176.3 ± 7.4                                                                                 | 170.1 ± 6.0                                  | <b>0.020</b> | <b>6.2* [1.0, 11.4]</b> | 170.1 ± 7.2                                     | <b>0.022</b> | <b>6.1* [0.9, 11.3]</b>   | 169.4 ± 6.2                            | <b>0.007</b> | <b>6.9* [1.9, 11.8]</b> |
| Time since injury (years)                                  | 1.6 ± 0.4                                                                                   | 3.8 ± 2.6                                    | 0.050        | 2.2 [-0.0, 4.4]         |                                                 |              |                           |                                        |              |                         |
| Knee flexion angle at IC (°)                               | 28.7 ± 6.3                                                                                  | 24.4 ± 8.5                                   | 0.132        | 4.3 [-1.3, 9.9]         | 22.9 ± 7.5                                      | <b>0.043</b> | <b>5.8* [0.2, 11.4]</b>   | 24.3 ± 7.8                             | 0.102        | 4.5 [-0.9, 9.8]         |
| Knee flexion angle peak (°)                                | 66.0 ± 6.0                                                                                  | 62.0 ± 7.4                                   | 0.190        | 4.0 [-2.0, -10.1]       | 61.1 ± 7.2                                      | 0.111        | 4.9 [-1.1, 11.0]          | 63.1 ± 6.7                             | 0.317        | 2.9 [-2.8, 8.7]         |
| Knee abduction angle at IC (°)                             | 3.1 ± 4.3                                                                                   | 3.6 ± 4.3                                    | 0.839        | 0.4 [-3.6, 4.4]         | 4.3 ± 4.2                                       | 0.568        | 1.2 [-2.8, 5.2]           | 5.0 ± 4.5                              | 0.341        | 1.8 [-2.0, 5.6]         |
| Knee abduction angle peak (°)                              | 8.8 ± 4.6                                                                                   | 9.3 ± 5.3                                    | 0.834        | 0.5 [-4.2, 5.2]         | 10.8 ± 4.3                                      | 0.405        | 2.0 [-2.7, 6.7]           | 10.9 ± 5.4                             | 0.342        | 2.2 [-2.3, 6.7]         |
| Knee abduction moment peak (N·m·kg <sup>-1</sup> )         | 1.09 ± 0.26                                                                                 | 1.39 ± 0.52                                  | 0.330        | 0.30 [-0.31, 0.91]      | 1.82 ± 0.59                                     | <b>0.018</b> | <b>0.74* [0.13, 1.35]</b> | 1.68 ± 0.54                            | 0.051        | 0.59 [-0.00, 1.18]      |
| Knee internal rotation moment peak (N·m·kg <sup>-1</sup> ) | 0.35 ± 0.37                                                                                 | 0.18 ± 0.20                                  | 0.145        | 0.17 [-0.06, 0.40]      | 0.24 ± 0.19                                     | 0.314        | 0.12 [-0.11, 0.35]        | 0.24 ± 0.20                            | 0.294        | 0.11 [-0.10, 0.34]      |
| Cutting angle (°)                                          | 83.5 ± 21.4                                                                                 | 71.8 ± 18.9                                  | 0.218        | 11.7 [-6.9, 30.3]       | 65.4 ± 19.4                                     | 0.057        | 18.1 [-0.5, 36.7]         | 66.2 ± 21.0                            | 0.055        | 17.3 [-0.4, 35.0]       |
| Approach speed at IC (m·s <sup>-1</sup> )                  | 2.98 ± 0.50                                                                                 | 2.97 ± 0.42                                  | 0.979        | 0.01 [-0.35, 0.36]      | 3.27 ± 0.47                                     | 0.115        | 0.29 [-0.07, 0.65]        | 3.11 ± 0.50                            | 0.461        | 0.13 [-0.21, 0.47]      |

Values are means ± SD. ACL, anterior cruciate ligament; MD, mean difference; CI, confidence interval; IC, initial contact; Prev/New ACL group, players with a previous ACL injury who went on to sustain a new ipsilateral secondary ACL injury; Prev ACL group, players with a previous ACL injury only; New ACL group, players without a previous ACL injury who went on to sustain a new primary ACL injury; No ACL group, injury free players.

\*significant mean difference (p ≤ 0.05).

**Table A2.** Comparison of participant characteristics, knee biomechanics and cutting technique variables between players with a secondary contralateral ACL injury (shaded grey) and the remaining three groups (n = 734 for kinematics; n = 694 for kinetics).

|                                                               | Prev/New ACL group,<br>contralateral leg of<br>players with a new<br>contralateral injury<br>(n=8) | Prev ACL group,<br>contralateral leg<br>(n=50) | p     | MD [95% CI]        | New ACL group,<br>leg with new injury<br>(n=46) | p            | MD [95% CI]               | No ACL group,<br>random leg<br>(n=630) | p            | MD [95% CI]            |
|---------------------------------------------------------------|----------------------------------------------------------------------------------------------------|------------------------------------------------|-------|--------------------|-------------------------------------------------|--------------|---------------------------|----------------------------------------|--------------|------------------------|
| Age (y)                                                       | 24.2 ± 3.9                                                                                         | 23.3 ± 4.2                                     | 0.566 | 0.9 [-2.1, 3.8]    | 19.3 ± 3.1                                      | <b>0.001</b> | <b>4.9* [1.9, 7.9]</b>    | 20.7 ± 3.9                             | <b>0.013</b> | <b>3.5* [0.7, 6.3]</b> |
| Body mass (kg)                                                | 69.8 ± 7.4                                                                                         | 66.8 ± 7.2                                     | 0.279 | 3.0 [-2.4, 8.4]    | 66.4 ± 7.6                                      | 0.217        | 3.4 [-2.0, 8.9]           | 66.0 ± 7.7                             | 0.146        | 3.8 [-1.3, 8.9]        |
| Height (cm)                                                   | 170.1 ± 7.7                                                                                        | 170.1 ± 6.0                                    | 0.989 | 0.0 [-4.4, 4.5]    | 170.1 ± 7.2                                     | 0.987        | 0.0 [-4.5, 4.5]           | 169.4 ± 6.2                            | 0.737        | 0.7 [-3.5, 4.9]        |
| Time since injury (years)                                     | 3.2 ± 1.9                                                                                          | 3.8 ± 2.6                                      | 0.558 | 0.6 [-1.4, 2.5]    |                                                 |              |                           |                                        |              |                        |
| Knee flexion angle at IC (°)                                  | 23.6 ± 11.5                                                                                        | 24.9 ± 7.8                                     | 0.610 | 1.2 [-3.6, 6.0]    | 22.9 ± 7.5                                      | 0.773        | 0.7 [-4.1, 5.5]           | 24.3 ± 7.8                             | 0.780        | 0.6 [-3.9, 5.1]        |
| Knee flexion angle peak (°)                                   | 61.5 ± 6.2                                                                                         | 63.6 ± 6.4                                     | 0.430 | 2.1 [-3.1, 7.2]    | 61.1 ± 7.2                                      | 0.865        | 0.4 [-4.7, 5.6]           | 63.1 ± 6.7                             | 0.531        | 1.5 [-3.3, 6.4]        |
| Knee abduction angle at IC (°)                                | 6.2 ± 3.8                                                                                          | 4.4 ± 4.0                                      | 0.299 | 1.8 [-1.6, 5.2]    | 4.3 ± 4.2                                       | 0.270        | 1.9 [-1.5, 5.4]           | 5.0 ± 4.5                              | 0.443        | 1.2 [-1.9, 4.4]        |
| Knee abduction angle peak (°)                                 | 11.5 ± 5.4                                                                                         | 10.0 ± 4.9                                     | 0.467 | 1.5 [-2.5, 5.5]    | 10.8 ± 4.3                                      | 0.722        | 0.7 [-3.3, 4.8]           | 10.9 ± 5.4                             | 0.769        | 0.6 [-3.2, 4.3]        |
| Knee abduction moment peak<br>(N·m·kg <sup>-1</sup> )         | 1.75 ± 0.32                                                                                        | 1.57 ± 0.56                                    | 0.389 | 0.18 [-0.23, 0.60] | 1.82 ± 0.59                                     | 0.729        | 0.07 [-0.35, 0.49]        | 1.68 ± 0.54                            | 0.705        | 0.08 [-0.31, 0.46]     |
| Knee internal rotation<br>moment peak (N·m·kg <sup>-1</sup> ) | 0.24 ± 0.28                                                                                        | 0.28 ± 0.24                                    | 0.662 | 0.04 [-0.12, 0.19] | 0.24 ± 0.19                                     | 0.954        | 0.01 [-0.15, 0.16]        | 0.24 ± 0.20                            | 0.941        | 0.01 [-0.14, 0.15]     |
| Cutting angle (°)                                             | 72.3 ± 19.7                                                                                        | 70.9 ± 20.4                                    | 0.868 | 1.4 [-14.7, 17.5]  | 65.4 ± 19.4                                     | 0.403        | 6.9 [-9.3, 23.0]          | 66.2 ± 21.0                            | 0.428        | 6.1 [-8.9, 21.1]       |
| Approach speed at IC (m·s <sup>-1</sup> )                     | 2.92 ± 0.54                                                                                        | 3.07 ± 0.45                                    | 0.323 | 0.16 [-0.15, 0.47] | 3.27 ± 0.47                                     | <b>0.028</b> | <b>0.35* [0.04, 0.66]</b> | 3.11 ± 0.50                            | 0.201        | 0.19 [-0.10, 0.48]     |

Values are means ± SD. ACL, anterior cruciate ligament; MD, mean difference; CI, confidence interval; IC, initial contact; Prev/New ACL group, players with a previous ACL injury who went on to sustain a new contralateral secondary ACL injury; Prev ACL group, players with a previous ACL injury only; New ACL group, players without a previous ACL injury who went on to sustain a new primary ACL injury; No ACL group, injury free players. \*significant mean difference (p ≤ 0.05).
